# Supplementary material for: Room-temperature ferroelectric and ferroelastic orders coexisting in a new tetrafluoroborate-based perovskite
Source: Royal Society of Chemistry journal article supplement (doi:10.1039/d1sc01345a), 2021-01-01
Supplement: d1sc01345a2.pdf [file d1sc01345a2.pdf]

# A Tetrafluoroborate-Based Perovskite with Multiferroic Properties Above Room Temperature

Chemical  
Science

Functional materials with multiferroic properties above room temperature can be used to make

Switches

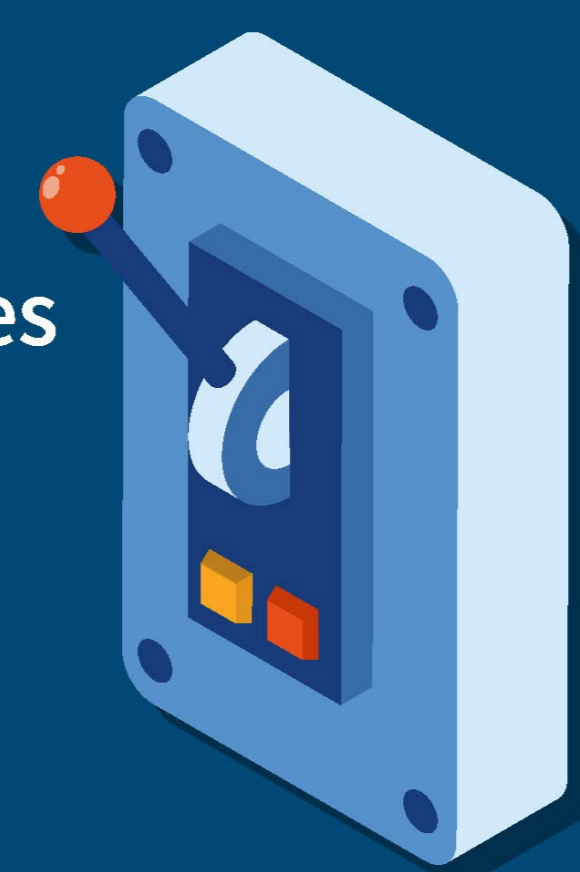

Multiple-state memory

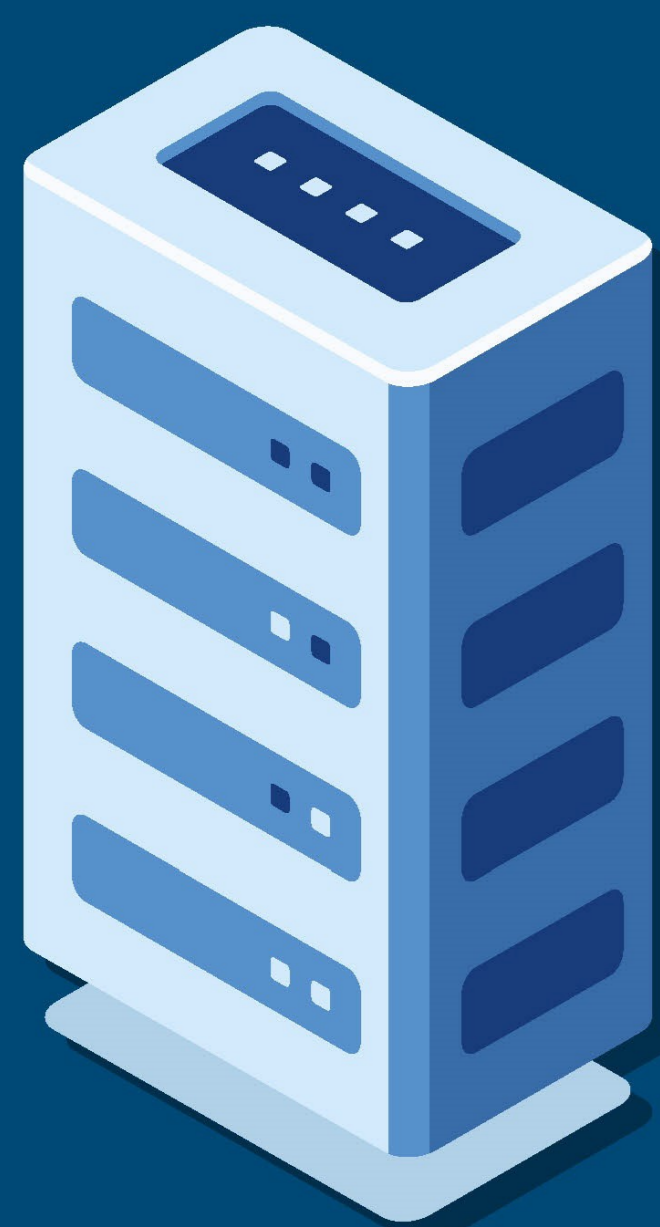

Computing circuits

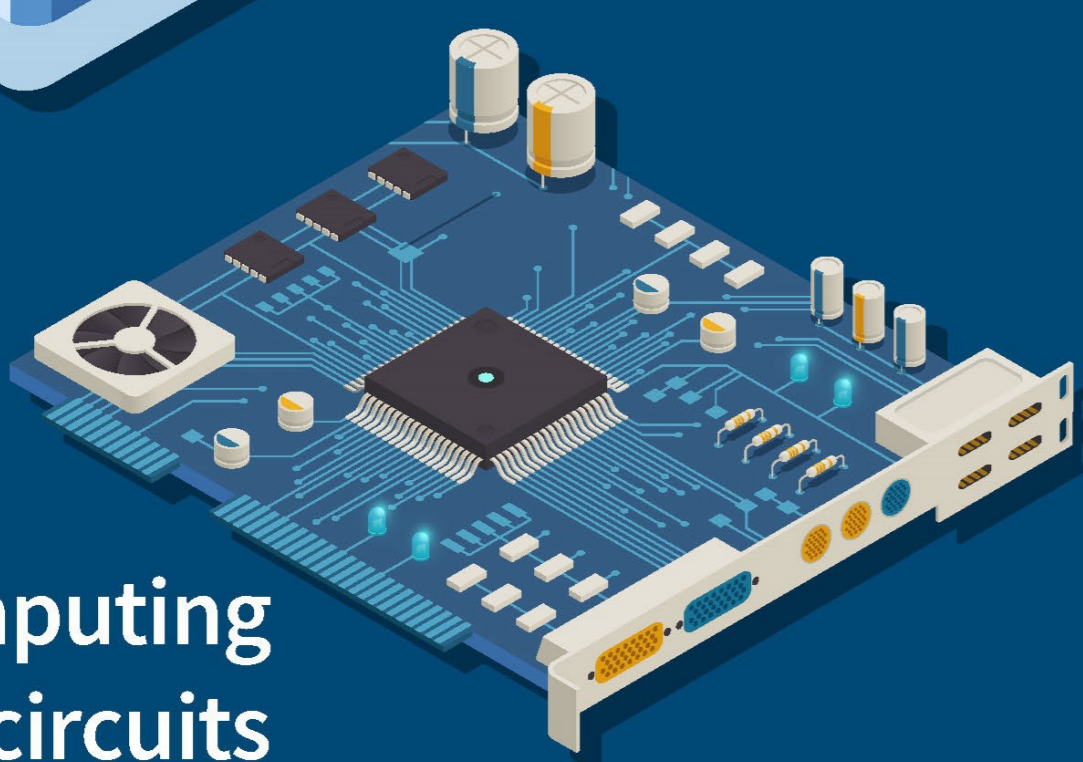

But designing such materials has been challenging

Structure of a new material obtained that shows multiferroic properties (co-existing ferroelectric and ferroelastic states) above room temperature

Adding a polar organic cation to a tetrafluoroborate-based perovskite system

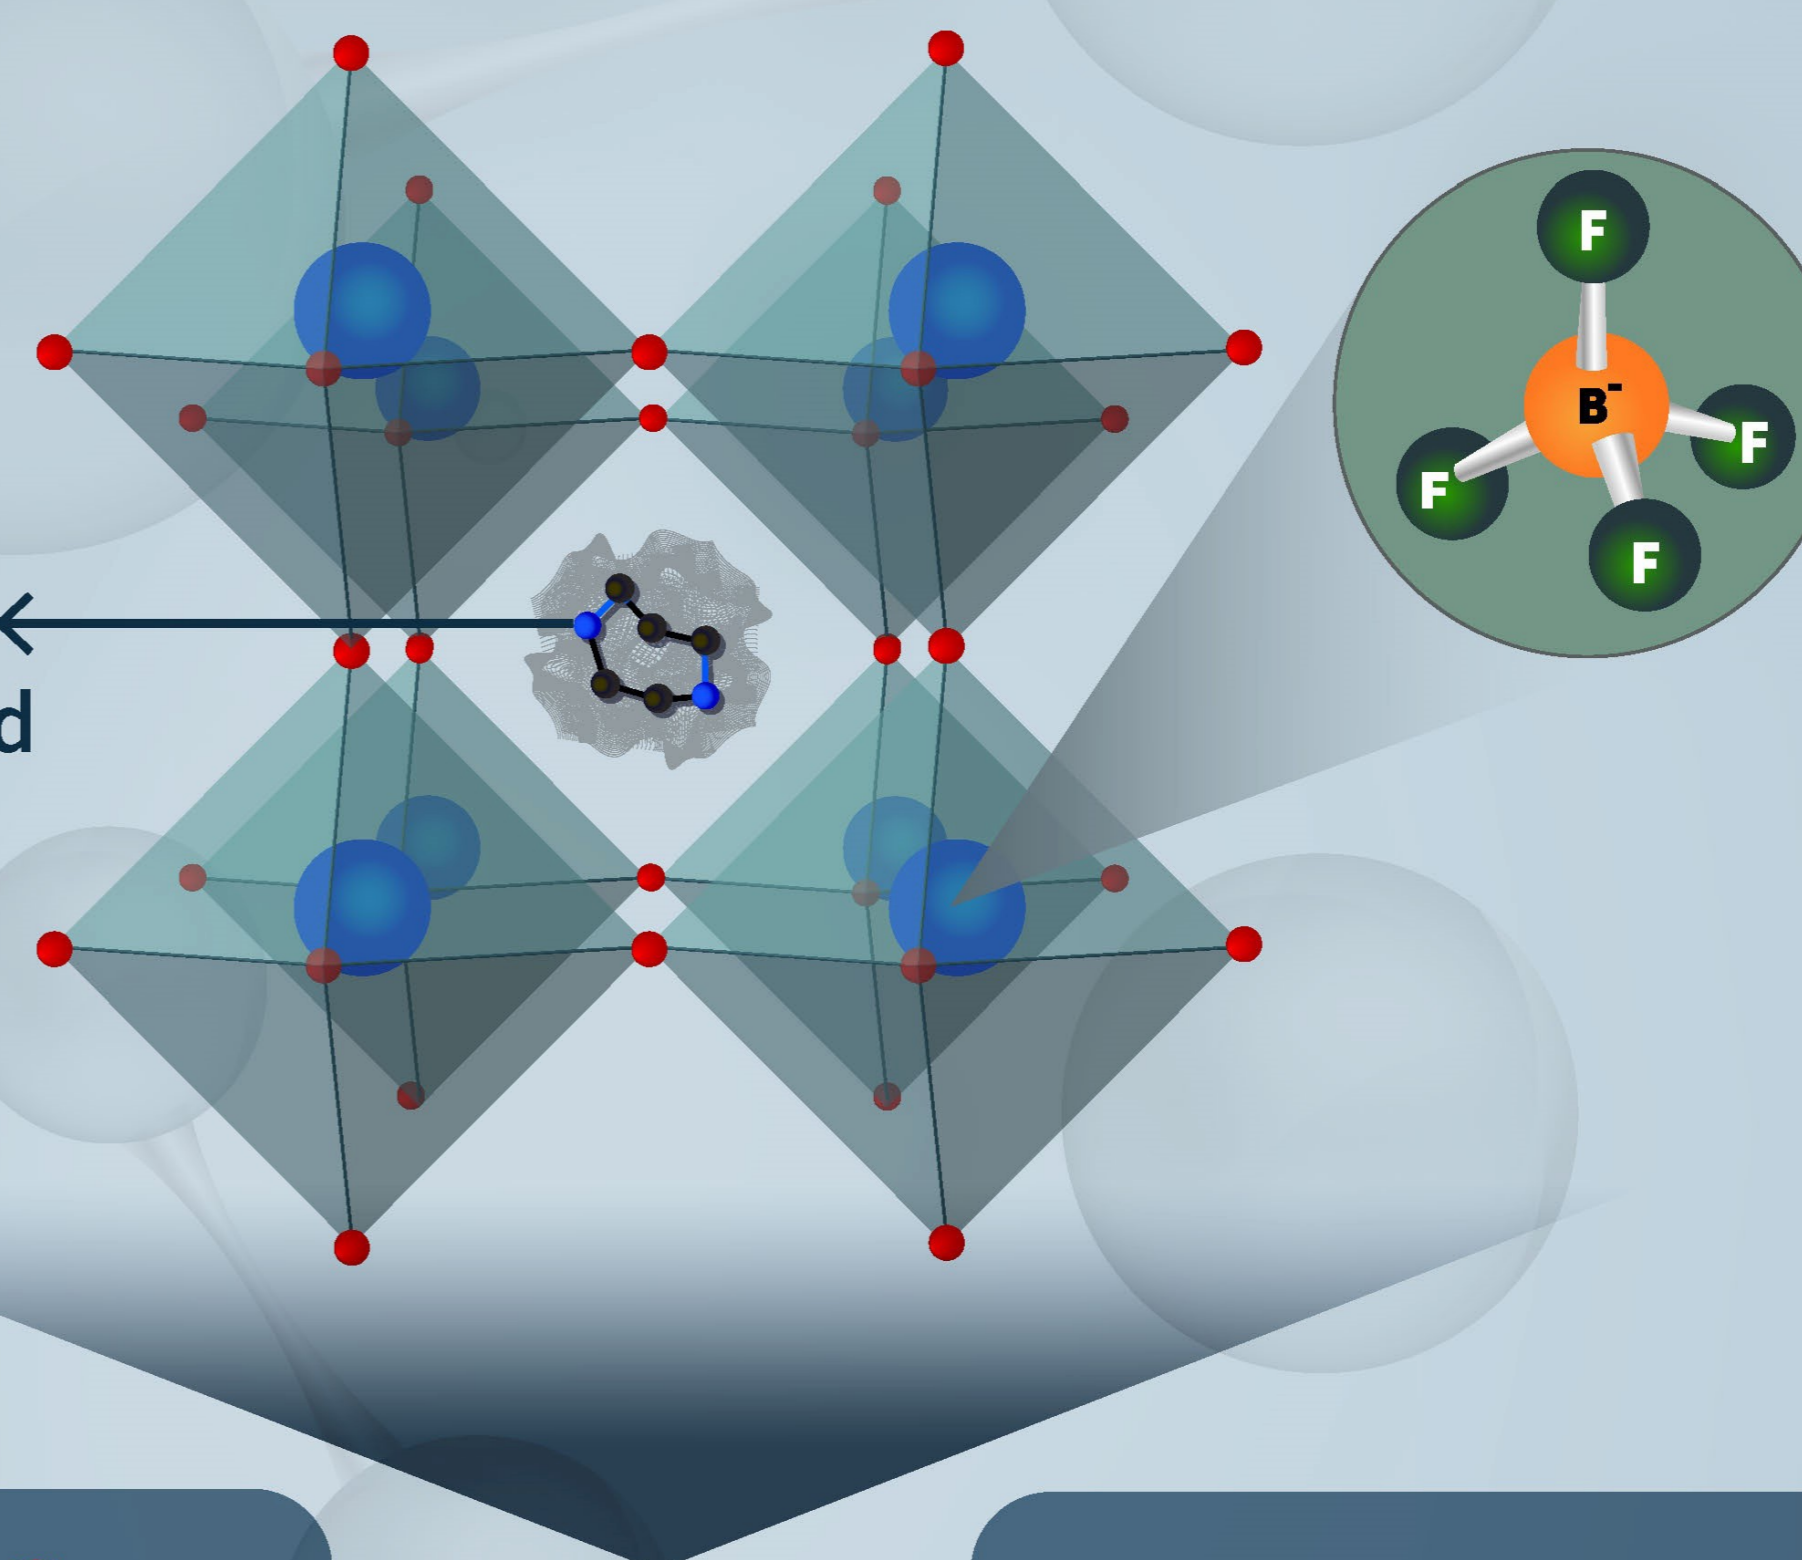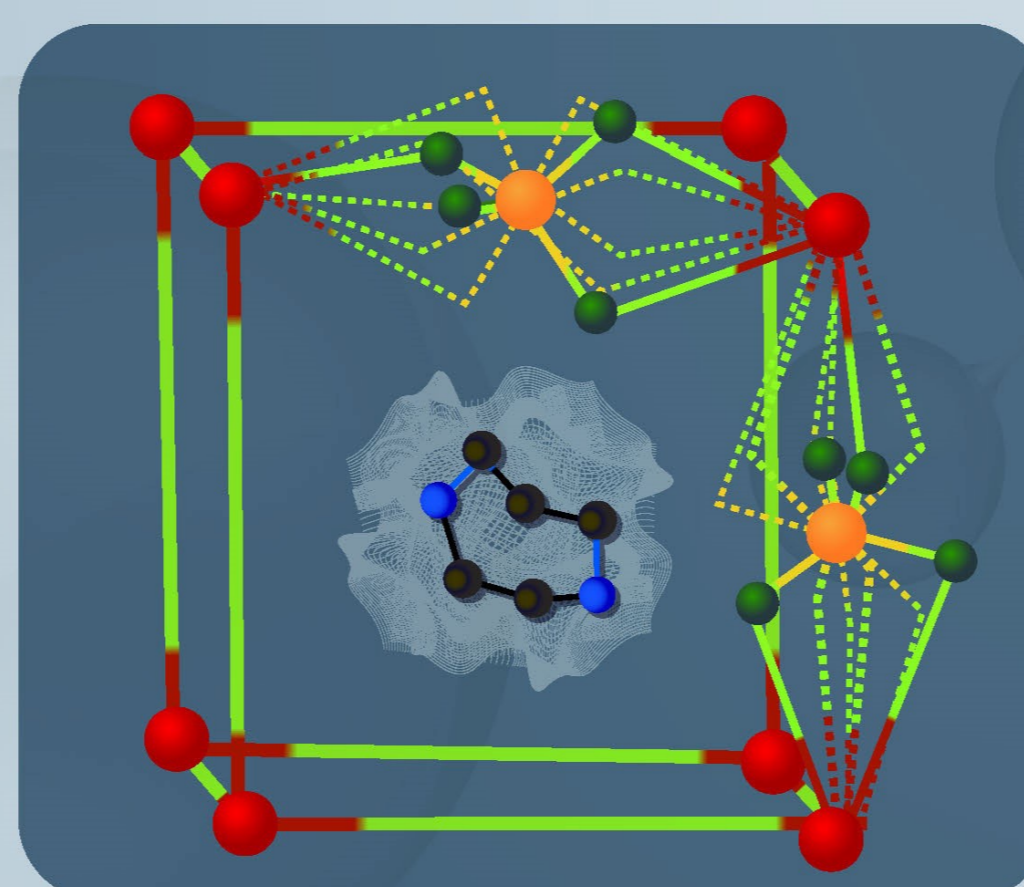

Ferroelastic state at below 455 K with disordered cations

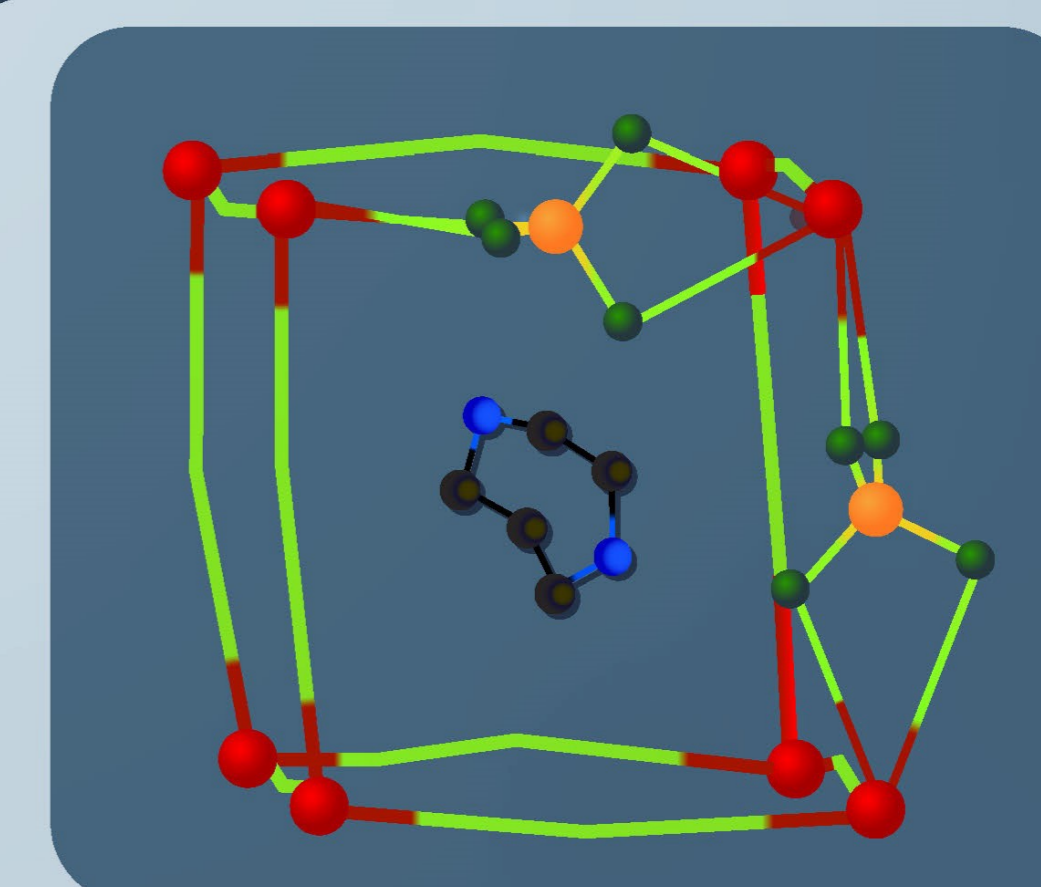

Ferroelectric state at below 311 K with ordered cations

This system provides clues for the development of advanced multiferroic materials for use in next-generation flexible devices
